# Supplementary material for: Dietary fibre and incidence of type 2 diabetes in eight European countries: the EPIC-InterAct Study and a meta-analysis of prospective studies
Source: PubMed Central journal article supplement (PMC4472947; doi:10.1007/s00125-015-3585-9), 2015-05-29

**ESM Figure 1:** Flow-chart of study selection for the meta-analysis

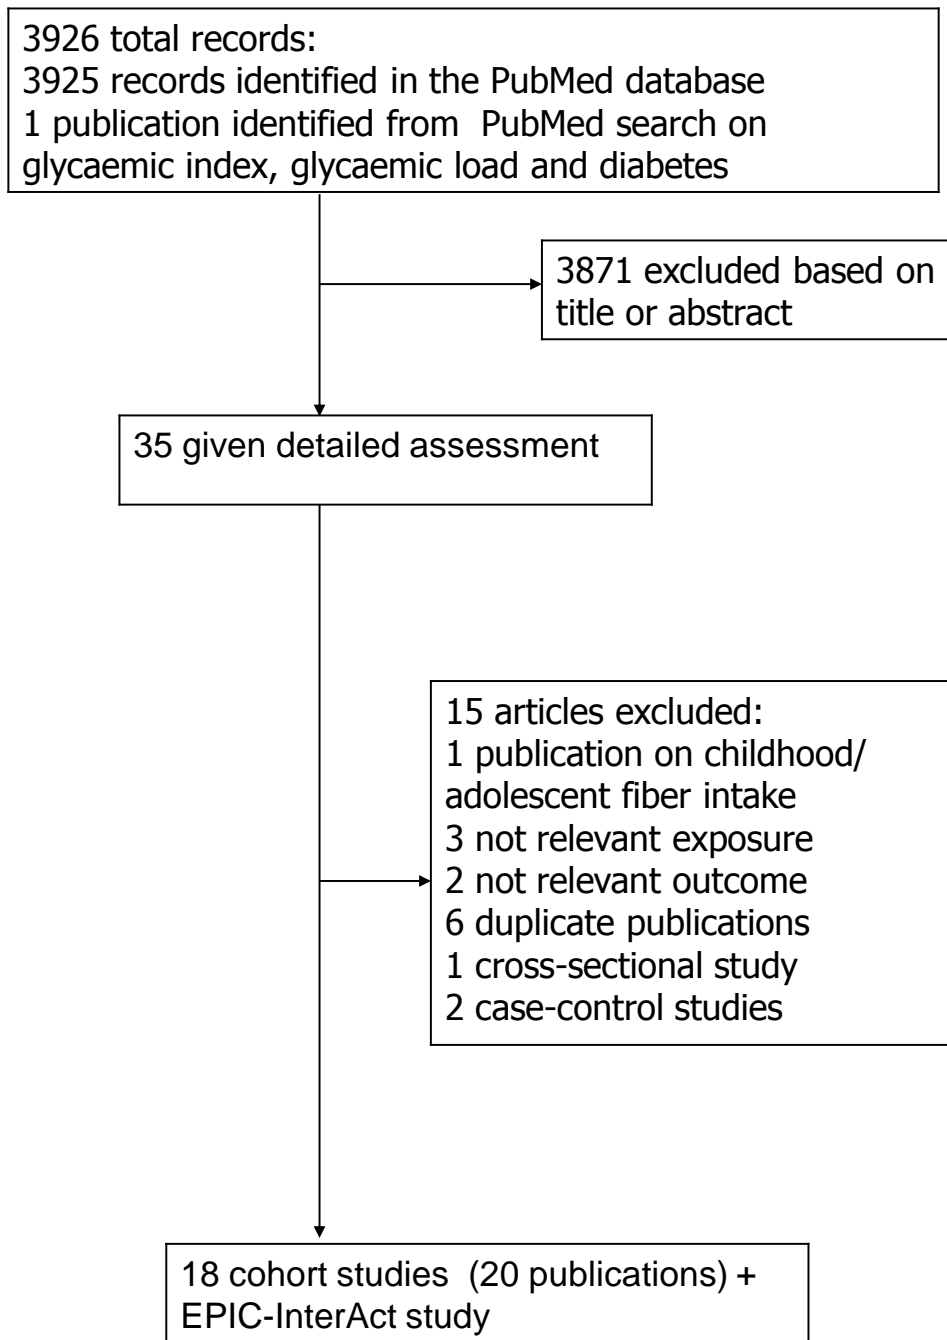

Supplement: 125_2015_3585_MOESM3_ESM.pdf [file 125_2015_3585_MOESM3_ESM.pdf]
