# Supplementary material for: Dietary fibre and incidence of type 2 diabetes in eight European countries: the EPIC-InterAct Study and a meta-analysis of prospective studies
Source: PubMed Central journal article supplement (PMC4472947; doi:10.1007/s00125-015-3585-9), 2015-05-29

**ESM Figure 2:** Dietary fibre (a), cereal fibre (b), fruit fibre (c), vegetable fibre (d) and type 2 diabetes. RRs for the highest vs. the lowest intake. The RR of each study is represented by a square and the size of the square represents the weight of each study to the overall estimate. 95% CIs are represented by the horizontal lines and the diamond represents the overall estimate and its 95% CI

**A**

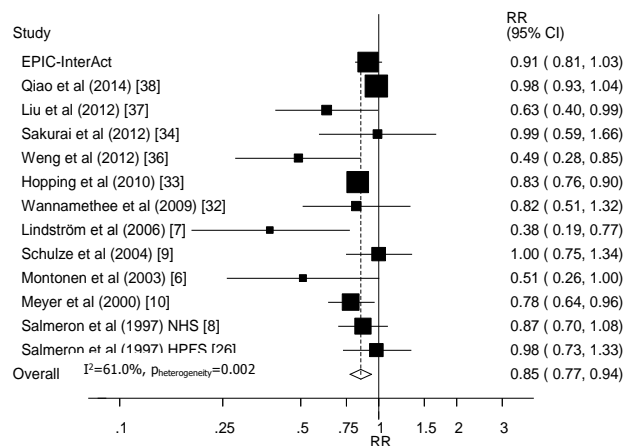

**C**

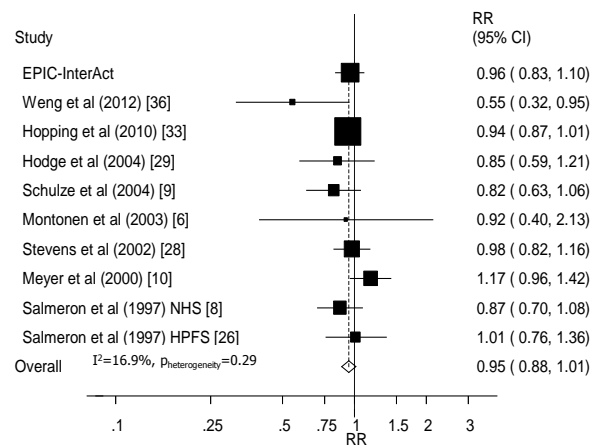

**B**

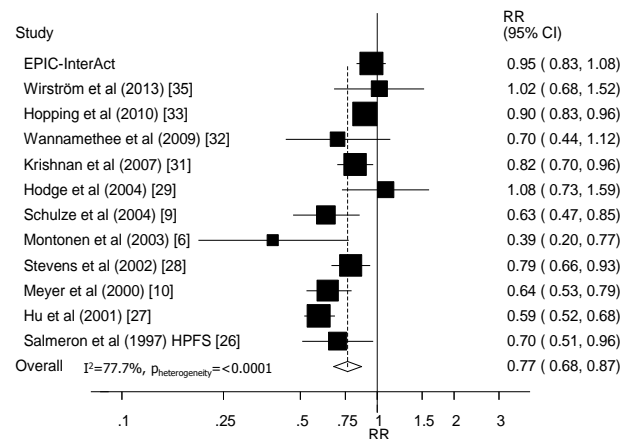

**D**

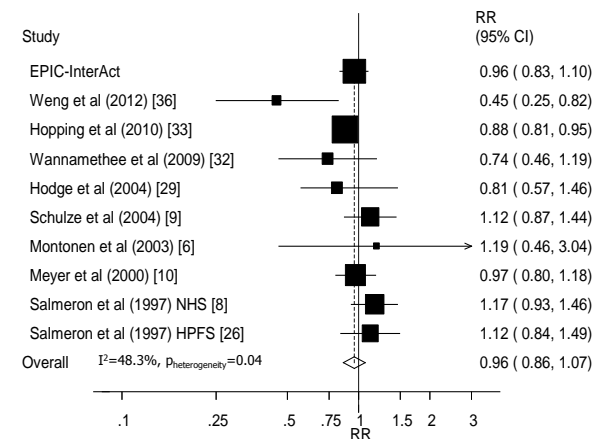

Supplement: 125_2015_3585_MOESM4_ESM.pdf [file 125_2015_3585_MOESM4_ESM.pdf]
