# Supplementary material for: Dietary fibre and incidence of type 2 diabetes in eight European countries: the EPIC-InterAct Study and a meta-analysis of prospective studies
Source: PubMed Central journal article supplement (PMC4472947; doi:10.1007/s00125-015-3585-9), 2015-05-29
Supplement: 125_2015_3585_MOESM6_ESM.pdf [file 125_2015_3585_MOESM6_ESM.pdf]

**ESM Figure 4:** Funnel plot for meta-analysis of cereal fibre and type 2 diabetes

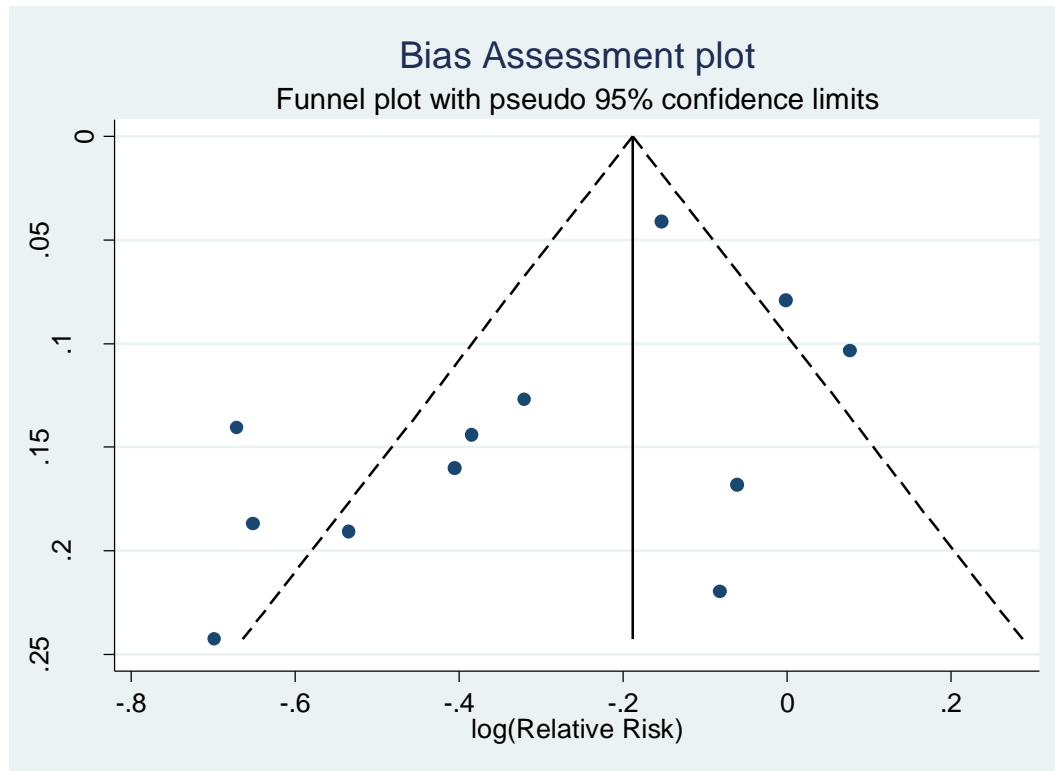

The funnel plot is based on the fixed effects model as recommended by Sterne and Harbord.

Sterne JAC, Harbord RM. Funnel plots in meta-analysis. *Stata Journal* 2004; 4(2): 127-141.
