# Supplementary material for: Dietary fibre and incidence of type 2 diabetes in eight European countries: the EPIC-InterAct Study and a meta-analysis of prospective studies
Source: PubMed Central journal article supplement (PMC4472947; doi:10.1007/s00125-015-3585-9), 2015-05-29
Supplement: 125_2015_3585_MOESM7_ESM.pdf [file 125_2015_3585_MOESM7_ESM.pdf]

**ESM Table 1:** Mean BMI per quartile of total fibre intake by country

| Country     | Q1    | Q2    | Q3    | Q4    |
|-------------|-------|-------|-------|-------|
| All         | 25.8  | 25.99 | 26.18 | 26.16 |
| France      | 23.44 | 23.02 | 23.03 | 22.53 |
| Italy       | 25.58 | 25.45 | 25.92 | 26.60 |
| Spain       | 28.00 | 28.01 | 28.34 | 28.18 |
| UK          | 25.67 | 25.29 | 25.50 | 24.97 |
| Netherlands | 25.24 | 25.24 | 25.26 | 26.23 |
| Germany     | 25.80 | 26.00 | 25.82 | 25.14 |
| Sweden      | 25.07 | 25.37 | 25.00 | 24.76 |
| Denmark     | 26.36 | 26.30 | 26.00 | 25.64 |
