# Supplementary material for: Dietary fibre and incidence of type 2 diabetes in eight European countries: the EPIC-InterAct Study and a meta-analysis of prospective studies
Source: Springer Nature journal article supplement (doi:10.1007/s00125-015-3585-9), 2015-05-28
Supplement: MOESM8 [file 8092970]

**ESM Table 2.** Table of RRs (95% CIs) from nonlinear dose-response analysis

|           | Fibre            |            | Cereal fibre     |           | Fruit fibre      |            | Vegetable fibre  |
|-----------|------------------|------------|------------------|-----------|------------------|------------|------------------|
| Quantity  | RR (95% CI)      | Quantity   | RR (95% CI)      | Quantity  | RR (95% CI)      | Quantity   | RR (95% CI)      |
| 3.4 g/day | 1.00             | 1.74 g/day | 1.00             | 1.0 g/day | 1.00             | 1.25 g/day | 1.00             |
| 5.0       | 0.99 (0.95-1.02) | 5.0        | 0.88 (0.84-0.93) | 2.0       | 0.95 (0.89-1.00) | 2.0        | 1.01 (1.00-1.01) |
| 10.0      | 0.95 (0.86-1.06) | 10.0       | 0.80 (0.74-0.87) | 4.0       | 0.93 (0.87-1.00) | 4.0        | 1.04 (1.01-1.06) |
| 15.0      | 0.92 (0.79-1.08) | 15.0       | 0.72 (0.65-0.79) | 6.0       | 0.92 (0.86-0.99) | 6.0        | 1.06 (1.02-1.10) |
| 20.0      | 0.88 (0.73-1.06) | 20.0       | 0.61 (0.51-0.73) | 8.0       | 0.91 (0.85-0.98) | 8.0        | 1.06 (1.00-1.12) |
| 25.0      | 0.84 (0.68-1.03) | 25.0       | 0.48 (0.34-0.69) | 10.0      | 0.90 (0.83-0.97) | 10.0       | 1.01 (0.95-1.07) |
| 30.0      | 0.78 (0.64-0.96) | 30.0       | 0.35 (0.19-0.66) | 12.0      | 0.87 (0.80-0.95) | 12.0       | 0.90 (0.84-0.96) |
| 35.0      | 0.72 (0.59-0.88) |            |                  | 14.0      | 0.84 (0.74-0.95) | 14.0       | 0.74 (0.66-0.82) |
| 40.0      | 0.65 (0.53-0.79) |            |                  |           |                  |            |                  |
