# Supplementary material for: Dietary fibre and incidence of type 2 diabetes in eight European countries: the EPIC-InterAct Study and a meta-analysis of prospective studies
Source: Springer Nature journal article supplement (doi:10.1007/s00125-015-3585-9), 2015-05-28
Supplement: MOESM9 [file 8092970]

**ESM Table 3:** Subgroup analyses of fibre and sources of fibre and type 2 diabetes risk, dose-response meta-analysis per 10 g/d

|                                    | Total fibre, per 10 g/d |                   |                           |                                    |                                    | Cereal fibre, per 10 g/d |                   |                           |                                    |                                    | Fruit fibre, per 10 g/d |                   |                           |                                    |                                    |      |
|------------------------------------|-------------------------|-------------------|---------------------------|------------------------------------|------------------------------------|--------------------------|-------------------|---------------------------|------------------------------------|------------------------------------|-------------------------|-------------------|---------------------------|------------------------------------|------------------------------------|------|
|                                    | <i>n</i>                | RR (95% CI)       | <i>I</i> <sup>2</sup> (%) | <i>P</i> <sub>h</sub> <sup>a</sup> | <i>P</i> <sub>h</sub> <sup>b</sup> | <i>n</i>                 | RR (95% CI)       | <i>I</i> <sup>2</sup> (%) | <i>P</i> <sub>h</sub> <sup>a</sup> | <i>P</i> <sub>h</sub> <sup>b</sup> | <i>n</i>                | RR (95% CI)       | <i>I</i> <sup>2</sup> (%) | <i>P</i> <sub>h</sub> <sup>a</sup> | <i>P</i> <sub>h</sub> <sup>b</sup> |      |
| All studies                        | 15                      | 0.91 (0.87, 0.96) | 29.4                      | 0.14                               |                                    | 12                       | 0.75 (0.65, 0.86) | 75.1                      | <0.0001                            |                                    | 11                      | 0.95 (0.87, 1.03) | 31.1                      | 0.15                               |                                    |      |
| Duration of follow-up              |                         |                   |                           |                                    |                                    |                          |                   |                           |                                    |                                    |                         |                   |                           |                                    |                                    |      |
| <10 yrs follow-up                  | 11                      | 0.91 (0.84, 0.98) | 38.7                      | 0.09                               | 0.85                               | 8                        | 0.68 (0.55, 0.85) | 76.9                      | <0.0001                            | 0.19                               | 7                       | 0.95 (0.82, 1.10) | 55.0                      | 0.04                               | 0.65                               |      |
| ≥10 yrs follow-up                  | 4                       | 0.92 (0.87, 0.96) | 12.8                      | 0.33                               |                                    | 4                        | 0.87 (0.76, 1.00) | 49.8                      | 0.11                               |                                    | 4                       | 0.92 (0.86, 0.99) | 0                         | 0.99                               |                                    |      |
| Gender                             |                         |                   |                           |                                    |                                    |                          |                   |                           |                                    |                                    |                         |                   |                           |                                    |                                    |      |
| Men                                | 4                       | 0.91 (0.87, 0.96) | 0                         | 0.88                               | 0.61/<br>0.83 <sup>c</sup>         | 3                        | 0.80 (0.64, 1.01) | 50.9                      | 0.13                               | 0.46/<br>0.33 <sup>c</sup>         | 2                       | 0.95 (0.86, 1.04) | 0                         | 0.50                               | 0.79/<br>0.79 <sup>c</sup>         |      |
| Women                              | 4                       | 0.92 (0.86, 0.98) | 17.4                      | 0.30                               |                                    | 6                        | 0.66 (0.52, 0.82) | 72.6                      | 0.003                              |                                    | 4                       | 0.93 (0.74, 1.16) | 63.7                      | 0.04                               |                                    |      |
| Men and women                      | 8                       | 0.89 (0.80, 0.98) | 55.9                      | 0.03                               |                                    | 5                        | 0.87 (0.72, 1.06) | 66.4                      | 0.02                               |                                    | 6                       | 0.95 (0.85, 1.05) | 17.0                      | 0.30                               |                                    |      |
| Geographic location                |                         |                   |                           |                                    |                                    |                          |                   |                           |                                    |                                    |                         |                   |                           |                                    |                                    |      |
| Europe                             | 4                       | 0.82 (0.68, 1.00) | 57.8                      | 0.07                               | 0.64                               | 3                        | 0.88 (0.69, 1.12) | 61.2                      | 0.08                               | 0.46                               | 2                       | 0.94 (0.77, 1.14) | 0                         | 0.85                               | 0.66                               |      |
| America                            | 6                       | 0.92 (0.89, 0.96) | 1.8                       | 0.41                               |                                    | 7                        | 0.64 (0.52, 0.78) | 76.9                      | <0.0001                            |                                    | 6                       | 0.98 (0.87, 1.11) | 50.5                      | 0.07                               |                                    |      |
| Asia                               | 2                       | 0.73 (0.58, 0.92) | 0                         | 0.63                               |                                    | 0                        |                   |                           |                                    |                                    | 1                       | 0.70 (0.52, 0.94) |                           |                                    |                                    |      |
| Australia                          | 3                       | 0.94 (0.80, 1.11) | 22.4                      | 0.28                               |                                    | 2                        | 1.05 (0.87, 1.26) | 0                         | 0.51                               |                                    | 2                       | 0.95 (0.81, 1.12) | 0                         | 0.67                               |                                    |      |
| Number of cases                    |                         |                   |                           |                                    |                                    |                          |                   |                           |                                    |                                    |                         |                   |                           |                                    |                                    |      |
| Cases <500                         | 8                       | 0.82 (0.71, 0.95) | 47.9                      | 0.06                               | 0.30                               | 4                        | 0.90 (0.72, 1.13) | 53.3                      | 0.09                               | 0.47                               | 4                       | 0.87 (0.74, 1.03) | 13.1                      | 0.33                               | 0.19                               |      |
| Cases 500-<1000                    | 3                       | 0.95 (0.86, 1.05) | 0                         | 0.92                               |                                    | 3                        | 0.54 (0.43, 0.68) | 0                         | 0.85                               |                                    | 3                       | 0.87 (0.67, 1.12) | 27.2                      | 0.25                               |                                    |      |
| Cases ≥1000                        | 4                       | 0.92 (0.88, 0.98) | 39.6                      | 0.17                               |                                    | 5                        | 0.76 (0.63, 0.92) | 81.0                      | <0.0001                            |                                    | 4                       | 1.00 (0.89, 1.12) | 54.7                      | 0.09                               |                                    |      |
| Adjustment for confounding factors |                         |                   |                           |                                    |                                    |                          |                   |                           |                                    |                                    |                         |                   |                           |                                    |                                    |      |
| Alcohol                            | Yes                     | 8                 | 0.92 (0.86, 0.98)         | 32.1                               | 0.17                               | 0.74                     | 6                 | 0.68 (0.50, 0.93)         | 86.8                               | <0.0001                            | 0.48                    | 7                 | 0.93 (0.80, 1.08)         | 50.6                               | 0.06                               | 0.78 |
|                                    | No                      | 7                 | 0.90 (0.82, 0.98)         | 36.8                               | 0.15                               |                          | 6                 | 0.81 (0.73, 0.89)         | 20.9                               | 0.28                               |                         | 4                 | 0.95 (0.88, 1.01)         | 0                                  | 0.50                               |      |

|                                 |     |    |                   |      |      |      |    |                   |      |         |      |    |                   |      |      |      |
|---------------------------------|-----|----|-------------------|------|------|------|----|-------------------|------|---------|------|----|-------------------|------|------|------|
| Smoking                         | Yes | 11 | 0.91 (0.86, 0.97) | 33.5 | 0.13 | 0.73 | 11 | 0.73 (0.61, 0.87) | 76.6 | <0.0001 | 0.55 | 10 | 0.95 (0.85, 1.06) | 34.6 | 0.13 | 0.82 |
|                                 | No  | 4  | 0.79 (0.57, 1.10) | 35.5 | 0.20 |      | 1  | 0.86 (0.79, 0.93) |      |         |      | 1  | 0.92 (0.85, 1.00) |      |      |      |
| Body mass index                 | Yes | 13 | 0.92 (0.87, 0.97) | 35.4 | 0.10 | 0.38 | 11 | 0.74 (0.64, 0.86) | 77.2 | <0.0001 | 0.51 | 10 | 0.95 (0.87, 1.04) | 37.5 | 0.11 | 0.76 |
|                                 | No  | 2  | 0.83 (0.69, 1.00) | 0    | 0.77 |      | 1  | 0.92 (0.61, 1.44) |      |         |      | 1  | 0.88 (0.60, 1.30) |      |      |      |
| Physical activity               | Yes | 13 | 0.92 (0.88, 0.96) | 31.6 | 0.13 | 0.22 | 11 | 0.76 (0.65, 0.88) | 76.3 | <0.0001 | 0.71 | 10 | 0.95 (0.87, 1.03) | 37.8 | 0.11 | 0.87 |
|                                 | No  | 2  | 0.76 (0.58, 0.98) | 0    | 0.89 |      | 1  | 0.67 (0.49, 0.91) |      |         |      | 1  | 0.75 (0.08, 7.20) |      |      |      |
| Coffee, caffeine                | Yes | 1  | 0.97 (0.78, 1.21) |      |      | 0.66 | 1  | 0.50 (0.31, 0.80) |      |         | 0.24 | 1  | 0.65 (0.40, 1.03) |      |      | 0.16 |
|                                 | No  | 14 | 0.91 (0.86, 0.96) | 33.8 | 0.11 |      | 11 | 0.77 (0.67, 0.88) | 74.8 | <0.0001 |      | 10 | 0.96 (0.89, 1.04) | 24.6 | 0.22 |      |
| Fat                             | Yes | 1  | 0.95 (0.86, 1.05) |      |      | 0.57 | 2  | 0.86 (0.63, 1.18) | 78.1 | 0.03    | 0.39 | 1  | 0.94 (0.78, 1.14) |      |      | 0.96 |
|                                 | No  | 14 | 0.90 (0.86, 0.96) | 33.0 | 0.11 |      | 10 | 0.72 (0.61, 0.85) | 75.7 | <0.0001 |      | 10 | 0.95 (0.86, 1.04) | 38.0 | 0.11 |      |
| Glycemic load or glycemic index | Yes | 2  | 0.97 (0.78, 1.21) | 0    | 0.91 | 0.65 | 2  | 0.64 (0.45, 0.91) | 47.3 | 0.17    | 0.40 | 1  | 0.65 (0.40, 1.03) |      |      | 0.16 |
|                                 | No  | 13 | 0.91 (0.86, 0.96) | 38.8 | 0.08 |      | 10 | 0.77 (0.66, 0.90) | 76.6 | <0.0001 |      | 10 | 0.96 (0.89, 1.04) | 24.6 | 0.22 |      |
| Magnesium                       | Yes | 2  | 0.95 (0.87, 1.04) | 0    | 0.87 | 0.44 | 2  | 0.73 (0.37, 1.44) | 86.6 | 0.006   | 0.80 | 2  | 0.83 (0.59, 1.17) | 52.5 | 0.15 | 0.45 |
|                                 | No  | 13 | 0.90 (0.85, 0.95) | 37.4 | 0.09 |      | 10 | 0.74 (0.63, 0.86) | 73.3 | <0.0001 |      | 9  | 0.96 (0.88, 1.05) | 32.9 | 0.16 |      |
| Energy intake                   | Yes | 12 | 0.92 (0.88, 0.96) | 22.9 | 0.22 | 0.13 | 10 | 0.72 (0.62, 0.84) | 79.2 | <0.0001 | 0.28 | 10 | 0.95 (0.87, 1.04) | 37.5 | 0.11 | 0.76 |
|                                 | No  | 3  | 0.73 (0.56, 0.97) | 13.2 | 0.32 |      | 2  | 0.93 (0.72, 1.21) | 0    | 0.94    |      | 1  | 0.88 (0.60, 1.30) |      |      |      |

*n* denotes the number of studies.

a) P for heterogeneity within each subgroup,

b) P for heterogeneity between subgroups with meta-regression analysis,

c) P for heterogeneity between men and women (studies with genders mixed were excluded)
