# Supplementary material for: Dietary fibre and incidence of type 2 diabetes in eight European countries: the EPIC-InterAct Study and a meta-analysis of prospective studies
Source: Springer Nature journal article supplement (doi:10.1007/s00125-015-3585-9), 2015-05-28
Supplement: MOESM10 [file 8092970]

**ESM Table 4:** Subgroup analyses of vegetable fibre and type 2 diabetes risk, dose-response meta-analysis per 10 g/d

|                                    |     | <b>Vegetable fibre, per 10 g/d</b> |                   |                           |                                    |                                    |
|------------------------------------|-----|------------------------------------|-------------------|---------------------------|------------------------------------|------------------------------------|
|                                    |     | <i>n</i>                           | RR (95% CI)       | <i>I</i> <sup>2</sup> (%) | <i>P</i> <sub>h</sub> <sup>a</sup> | <i>P</i> <sub>h</sub> <sup>b</sup> |
| All studies                        |     | 10                                 | 0.93 (0.82, 1.05) | 43.5                      | 0.07                               |                                    |
| Duration of follow-up              |     |                                    |                   |                           |                                    |                                    |
| <10 yrs follow-up                  |     | 6                                  | 0.98 (0.82, 1.05) | 52.9                      | 0.06                               | 0.21                               |
| ≥10 yrs follow-up                  |     | 4                                  | 0.88 (0.82, 0.94) | 0                         | 0.50                               |                                    |
| Gender                             |     |                                    |                   |                           |                                    |                                    |
| Men                                |     | 2                                  | 0.90 (0.69, 1.16) | 58.7                      | 0.12                               | 0.46/<br>0.28 <sup>c</sup>         |
| Women                              |     | 4                                  | 0.99 (0.88, 1.11) | 17.2                      | 0.31                               |                                    |
| Men and women                      |     | 5                                  | 0.78 (0.59, 1.03) | 47.0                      | 0.11                               |                                    |
| Geographic location                |     |                                    |                   |                           |                                    |                                    |
| Europe                             |     | 2                                  | 0.91 (0.69, 1.21) | 0                         | 0.81                               | 0.32                               |
| America                            |     | 5                                  | 0.99 (0.86, 1.15) | 44.6                      | 0.13                               |                                    |
| Asia                               |     | 1                                  | 0.52 (0.33, 0.82) |                           |                                    |                                    |
| Australia                          |     | 2                                  | 0.80 (0.47, 1.36) | 65.5                      | 0.09                               |                                    |
| Number of cases                    |     |                                    |                   |                           |                                    |                                    |
| Cases <500                         |     | 4                                  | 0.71 (0.47-1.07)  | 55.7                      | 0.08                               | 0.80                               |
| Cases 500-<1000                    |     | 3                                  | 1.14 (0.95-1.38)  | 0                         | 0.68                               |                                    |
| Cases ≥1000                        |     | 3                                  | 0.89 (0.83-0.95)  | 0                         | 0.81                               |                                    |
| Adjustment for confounding factors |     |                                    |                   |                           |                                    |                                    |
| Alcohol                            | Yes | 7                                  | 0.97 (0.83, 1.15) | 45.3                      | 0.09                               | 0.33                               |
|                                    | No  | 3                                  | 0.84 (0.69, 1.03) | 12.2                      | 0.32                               |                                    |

|                                 |     |   |                   |      |      |      |
|---------------------------------|-----|---|-------------------|------|------|------|
| Smoking                         | Yes | 9 | 0.94 (0.80, 1.11) | 44.5 | 0.07 | 0.75 |
|                                 | No  | 1 | 0.88 (0.82, 0.95) |      |      |      |
| Body mass index                 | Yes | 9 | 0.95 (0.84, 1.07) | 40.2 | 0.10 | 0.18 |
|                                 | No  | 1 | 0.58 (0.33, 1.00) |      |      |      |
| Physical activity               | Yes | 9 | 0.93 (0.82, 1.06) | 49.6 | 0.04 | 0.87 |
|                                 | No  | 1 | 1.16 (0.16, 8.22) |      |      |      |
| Coffee, caffeine                | Yes | 1 | 1.29 (0.93, 1.79) |      |      | 0.11 |
|                                 | No  | 9 | 0.90 (0.80, 1.01) | 29.0 | 0.19 |      |
| Fat                             | Yes | 1 | 0.91 (0.68, 1.21) |      |      | 0.93 |
|                                 | No  | 9 | 0.93 (0.81, 1.08) | 49.8 | 0.04 |      |
| Glycemic load or glycemic index | Yes | 1 | 1.29 (0.93, 1.79) |      |      | 0.11 |
|                                 | No  | 9 | 0.90 (0.80, 1.01) | 29.0 | 0.19 |      |
| Magnesium                       | Yes | 2 | 1.07 (0.76, 1.51) | 59.6 | 0.12 | 0.35 |
|                                 | No  | 8 | 0.90 (0.78, 1.03) | 37.7 | 0.13 |      |
| Energy intake                   | Yes | 9 | 0.95 (0.84, 1.07) | 40.2 | 0.10 | 0.18 |
|                                 | No  | 1 | 0.58 (0.33, 1.00) |      |      |      |

*n* denotes the number of studies.

- a) P for heterogeneity within each subgroup,
- b) P for heterogeneity between subgroups with meta-regression analysis,
- c) P for heterogeneity between men and women (studies with genders mixed were excluded)
